# Supplementary material for: Treatment burden and health-related quality of life of patients with multimorbidity: a cross-sectional study
Source: Springer Nature journal article supplement (doi:10.1007/s11136-023-03473-3), 2023-07-05

Age \_\_\_\_\_ Sex \_\_\_\_\_

Educational status \_\_\_\_\_ Marital status \_\_\_\_\_ Occupation \_\_\_\_\_

We are interested in finding out about the effort you have to make to look after your health and how these impacts on your day-to-day life.

Please tell us how much difficulty you have with the following: (Please tick the box that most applies to you)

|                                                                                                                         | Extremely difficult | Very difficult | Quite difficult | A little difficult | Not difficult | Does not apply |
|-------------------------------------------------------------------------------------------------------------------------|---------------------|----------------|-----------------|--------------------|---------------|----------------|
| 1. Taking lots of medications                                                                                           |                     |                |                 |                    |               |                |
| 2. Remembering how and when to take medication                                                                          |                     |                |                 |                    |               |                |
| 3. Collecting prescription medication                                                                                   |                     |                |                 |                    |               |                |
| 4. Monitoring your medical conditions (e.g. checking your blood pressure or blood sugar, monitoring your symptoms etc.) |                     |                |                 |                    |               |                |
| 5. Arranging appointments with health professionals                                                                     |                     |                |                 |                    |               |                |
| 6. Seeing lots of different health professionals                                                                        |                     |                |                 |                    |               |                |
| 7. Attending appointments with health professionals (e.g. getting time off work, arranging transport etc.)              |                     |                |                 |                    |               |                |
| 8. Obtaining clear and up-to-date information about your condition                                                      |                     |                |                 |                    |               |                |
| 9. Making recommended lifestyle changes (e.g. diet and exercise etc.)                                                   |                     |                |                 |                    |               |                |
| 10. Having to rely on help from family and friends                                                                      |                     |                |                 |                    |               |                |

**Under each heading, please tick the ONE box that best describes your health TODAY.**

| <b>Mobility</b>                           |  | <b>Self-care</b>                                    |  |
|-------------------------------------------|--|-----------------------------------------------------|--|
| I have no problems in walking about       |  | I have no problems washing or dressing myself       |  |
| I have slight problems in walking about   |  | I have slight problems washing or dressing myself   |  |
| I have moderate problems in walking about |  | I have moderate problems washing or dressing myself |  |
| I have severe problems in walking about   |  | I have severe problems washing or dressing myself   |  |
| I am unable to walk about                 |  | I am unable to wash or dress myself                 |  |

| <b>Usual activities</b> ( <i>e.g., work, study, housework, family or leisure activities</i> ) |  | <b>Pain/discomfort</b>             |  |
|-----------------------------------------------------------------------------------------------|--|------------------------------------|--|
| I have no problems doing my usual activities                                                  |  | I have no pain or discomfort       |  |
| I have slight problems doing my usual activities                                              |  | I have slight pain or discomfort   |  |
| I have moderate problems doing my usual activities                                            |  | I have moderate pain or discomfort |  |
| I have severe problems doing my usual activities                                              |  | I have severe pain or discomfort   |  |
| I am unable to do my usual activities                                                         |  | I have extreme pain or discomfort  |  |
| <b>Anxiety /depression</b>                                                                    |  |                                    |  |
| I am not anxious or depressed                                                                 |  |                                    |  |
| I am slightly anxious or depressed                                                            |  |                                    |  |
| I am moderately anxious or depressed                                                          |  |                                    |  |
| I am severely anxious or depressed                                                            |  |                                    |  |
| I am extremely anxious or depressed                                                           |  |                                    |  |

Your health today =

- We want to assess your health condition today.
- The figure has its own scale from 0- 100.
- 100 implies that you have a very good health condition.
- 0 implies you are experiencing a worst health condition.
- Please show your health status on the figure by ticking on the scales
- Now write the number you have marked on the box above

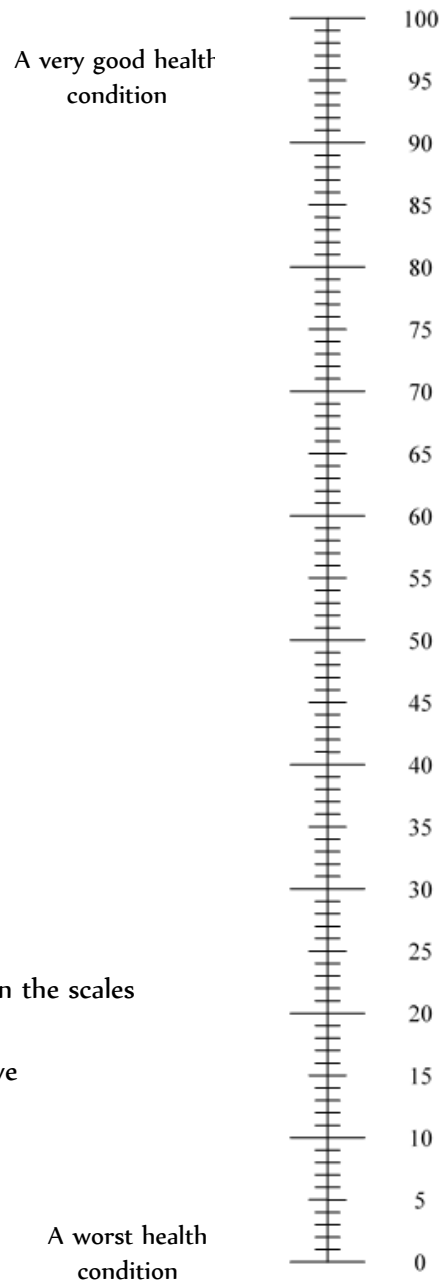

Supplement: MOESM3 [file 25579322]
