# Supplementary material for: Treatment burden and health-related quality of life of patients with multimorbidity: a cross-sectional study
Source: Springer Nature journal article supplement (doi:10.1007/s11136-023-03473-3), 2023-07-05
Supplement: MOESM2 [file 25579322]

እድሜ \_\_\_\_\_ ጾታ \_\_\_\_\_

የት/ት ደረጃ \_\_\_\_\_ የጋብቻ ሁኔታ \_\_\_\_\_ ስራ \_\_\_\_\_

ይህ መጠይቅ ያለብዎትን የጤና ሁኔታ እንዲሁም የጤና ሁኔታዎን ለመቆጣጠርና ለማሻሻል የሚያደርጉት ጥረት በእለት ተእለት ህይወትዎ ላይ ያለውን ተፅዕኖ ለማወቅ የተዘጋጀው ነው።

ከዚህ በታች የተዘረዘሩትን ተግባራት በአግባቡ ለማከናወን ምን ያህል እንደሚቸገሩ ይገልጹልን ዘንድ እንጠይቃለን፤ (ምላሽዎን ከእያንዳንዱ ጥያቄዎች ጎን በተቀመጡት ሳጥኖች ውስጥ ምልክት በማድረግ ይግለጹ።)

|                                                                                      | እጅግ በጣም ከባድ | በጣም ከባድ | የተወሰነ ይከብዳል | በትንሹ ይከብዳል | ምንም አይከብድም |
|--------------------------------------------------------------------------------------|-------------|---------|-------------|------------|------------|
| 1.ብዙ መድኃኖችን መውሰድ                                                                     |             |         |             |            |            |
| 2.መድኃኒቶችን መቼ እና እንዴት እንደሚወሰድ ማስታወስ                                                   |             |         |             |            |            |
| 3.የታዘዙትን መድኃኒቶች ከመድኃኒት ቤት መውሰድ (መግዛት)                                                |             |         |             |            |            |
| 4.የጤንነት ሁኔታዎን መከታተል (የደም ግፊትዎን መለካት፣ የደም የስኳር መጠንዎን እንዲሁም የሚሰማዎትን ነገር መቆጣጠር (መከታተል)) |             |         |             |            |            |
| 5.ከጤና ባለሙያዎች ጋር ያለዎትን ቀጠሮ ማመቻቸት                                                      |             |         |             |            |            |
| 6.የተለያዩ አይነት የጤና ባለሙያዎችን ማግኘት                                                        |             |         |             |            |            |
| 7.ከጤና ባለሙያ ጋር ያለዎትን የህክምና ቀጠሮ መከታተል (ከስራ ቦታ ውጥቶ መምጣት/መጓጓዣ/ትራንስፖርት ማመቻቸት. . .)        |             |         |             |            |            |
| 8. ስለጤና ሁኔታዎ ግልጽ እና አዳዲስ መረጃዎች ማግኘት                                                  |             |         |             |            |            |
| 9.ከጤና ባለሙያ የተነገረዎትን የአካል ብቃት እንቅስቃሴና የአመጋገብ ስርአት መተግበር                               |             |         |             |            |            |
| 10. በቤተሰብ (ቤተ ዘመድ) እና ጓደኛ ድጋፍ ላይ ጥገኛ መሆን                                             |             |         |             |            |            |

በእያንዳንዱ ርዕስ ስር፣ እባክዎ ዛሬ ያለዎትን ጤንነት በተሻለ ሁኔታ የሚገልጸው አንድ ሳጥን ላይ ምልክት ያድርጉ።

| እንቅስቃሴ                   | ራስን መንከባከብ                         |  |
|--------------------------|------------------------------------|--|
| የመራመድ ችግር የለብኝም          | ለመታጠብም ሆነ ለመልበስ ምንም ችግር የለብኝም      |  |
| አነስተኛ የሆነ የመራመድ ችግር አለብኝ | ለመታጠብም ሆነ ለመልበስ አነስተኛ የሆነ ችግር አለብኝ |  |
| መጠነኛ የሆነ የመራመድ ችግር አለብኝ  | ለመታጠብም ሆነ ለመልበስ መጠነኛ ችግር አለብኝ      |  |
| ከባድ የሆነ የመራመድ ችግር አለብኝ   | ለመታጠብም ሆነ ለመልበስ ከፍተኛ የሆነ ችግር አለብኝ  |  |
| ምንም መራመድ አልቸልም           | ራሴ ልታጠብም ሆነ ልለብስ አልቸልም             |  |

|                                                                     |  |                                     |     |
|---------------------------------------------------------------------|--|-------------------------------------|-----|
| መደበኛ ተግባራት (ለምሳሌ፡- ስራ፣ ትምህርት፣ የቤት ውስጥ ስራ፣ ቤተሰባዊ ወይም የአረፍት ጊዜ ተግባራት) |  | የሕመም ስሜት/ምቹት ማጣት                    |     |
| መደበኛ ተግባራቶቹን ያለ ምንም ችግር አከናውናለሁ                                     |  | የሕመም ስሜትም ሆነ የምቹት ማጣት ስሜት የለኝም      |     |
| መደበኛ ተግባራቶቹን ለማከናወን አነስተኛ ችግር አለብኝ                                  |  | አነስተኛ የሕመም ስሜት ወይም የምቹት ማጣት ስሜት አለኝ |     |
| መደበኛ ተግባራቶቹን ለማከናወን መጠነኛ ችግር አለብኝ                                   |  | መጠነኛ የሕመም ስሜት ወይም የምቹት ማጣት ስሜት አለኝ  |     |
| መደበኛ ተግባራቶቹን ለማከናወን ከፍተኛ ችግር አለብኝ                                   |  | ከባድ የሕመም ስሜት ወይም የምቹት ማጣት ስሜት አለኝ   |     |
| መደበኛ ተግባራቶቹን ለማከናወን አልቻልኩም                                          |  | የከፋ የሕመም ስሜት ወይም የምቹት ማጣት ስሜት አለኝ   |     |
| <b>ጭንቀት/ድብርት</b>                                                    |  |                                     |     |
| ጭንቀትም ሆነ ድብርት የለብኝም                                                 |  | ሊኖርዎ የሚችለው በጣም ጥሩው የጤና ሁኔታ          | 100 |
| አነስተኛ ጭንቀት ወይም ድብርት አለብኝ                                            |  |                                     | 95  |
| መጠነኛ ጭንቀት ወይም ድብርት አለብኝ                                             |  |                                     | 90  |
| ከባድ ጭንቀት ወይም ድብርት አለብኝ                                              |  |                                     | 85  |
| እጅግ ከባድ ጭንቀት ወይም ድብርት አለብኝ                                          |  |                                     | 80  |
|                                                                     |  |                                     | 75  |
|                                                                     |  |                                     | 70  |
|                                                                     |  |                                     | 65  |
|                                                                     |  |                                     | 60  |
|                                                                     |  |                                     | 55  |
|                                                                     |  |                                     | 50  |
|                                                                     |  |                                     | 45  |
|                                                                     |  |                                     | 40  |
|                                                                     |  |                                     | 35  |
|                                                                     |  |                                     | 30  |
|                                                                     |  |                                     | 25  |
|                                                                     |  |                                     | 20  |
|                                                                     |  |                                     | 15  |
|                                                                     |  |                                     | 10  |
|                                                                     |  |                                     | 5   |
|                                                                     |  | ሊኖርዎ የሚችለው በጣም መጥፎው የጤና ሁኔታ         | 0   |

የዛሬ ጤንነትዎ =

- ዛሬ የጤና ሁኔታዎ ምን ያህል ጥሩ ወይም መጥፎ መሆኑን ለማወቅ እንፈልጋለን።
- መለኪያው ከ0 እስከ 100 ድረስ ቁጥሮች አሉት።
- 100 ማለት ሊኖርዎ የሚችለው በጣም ጥሩው የጤና ሁኔታ ነው።  
0 ማለት ሊኖርዎ የሚችለው በጣም መጥፎው የጤና ሁኔታ ነው።
- በመለኪያው ላይ ዛሬ ጤንነትዎ ያለበትን ሁኔታ ለማሳየት የ X ምልክት ያድርጉ።
- አሁን፣ ከስር ባለው ሳጥን ውስጥ በመለኪያው ላይ ምልክት ያደረጉበትን ቁጥር ይጻፉ።
